# Supplementary material for: The Implication of Physically Demanding and Hazardous Work on Retirement Timing
Source: MDPI journal article supplement (doi:10.3390/ijerph19138123), 2022-07-01
Supplement: s1 [file s1]

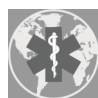

## Supplementary Materials

**Table S1.** Blue-collar workers. Interaction effect between binary age (64–76 vs. 59–63 years at baseline) and PDWT or PHWE on retired (vs. still in work).

|                         | <b>Women</b><br><b>OR (95% CI)</b> | <b>Men</b><br><b>OR (95% CI)</b> |
|-------------------------|------------------------------------|----------------------------------|
| <b>PDWT</b>             |                                    |                                  |
| Main effect:            |                                    |                                  |
| light (ref)             | –                                  | –                                |
| moderate                | 1.18 (0.79; 1.78)                  | 0.85 (0.56; 1.29)                |
| heavy                   | 1.82 (1.21; 2.74) *                | 1.21 (0.83; 1.79)                |
| Interaction with binary |                                    |                                  |
| age (≥64):              | –                                  | –                                |
| moderate                | 0.99 (0.39; 2.50)                  | 1.85 (0.87; 3.90)                |
| heavy                   | 0.36 (0.14; 0.92) *                | 1.71 (0.80; 3.65)                |
| <b>PHWE</b>             |                                    |                                  |
| Main effect:            |                                    |                                  |
| low-level (ref)         | –                                  | –                                |
| moderate                | 0.99 (0.69; 1.43)                  | 0.84 (0.52; 1.35)                |
| high-level              | 1.86 (1.06; 3.28) *                | 0.99 (0.63; 1.55)                |
| Interaction with binary |                                    |                                  |
| age (≥64):              | –                                  | –                                |
| moderate                | 1.55 (0.70; 3.42)                  | 2.57 (1.17; 5.63) *              |
| high-level              | 1.58 (0.30; 8.30)                  | 2.79 (1.28; 6.09) *              |

Fully adjusted for age (linear, quadratic and binary age), wave (categorical), education, marital status, parental status, working time, and caring for a relative. \* for  $p < 0.05$ .

**Table S2.** White-collar workers. Interaction effect between binary age (64–76 vs. 59–63 years at baseline) and PDWT or PHWE on retired (vs still in work).

|                         | <b>Women</b><br><b>OR (95% CI)</b> | <b>Men</b><br><b>OR (95% CI)</b> |
|-------------------------|------------------------------------|----------------------------------|
| <b>PDWT</b>             |                                    |                                  |
| Main effect             | 0.77 (0.62; 0.97) *                | 0.71 (0.55; 0.92) *              |
| Interaction with binary |                                    |                                  |
| age (≥64)               | 1.24 (0.83; 1.85)                  | 1.33 (0.85; 2.07)                |
| <b>PHWE</b>             |                                    |                                  |
| Main effect             | 0.95 (0.77; 1.17)                  | 1.03 (0.80; 1.34)                |
| Interaction with binary |                                    |                                  |
| age (≥64)               | 1.72 (1.15; 2.56) **               | 1.02 (0.64; 1.64)                |

Fully adjusted for age (linear, quadratic and binary age), wave (categorical), education, marital status, parental status, working time, and caring for a relative. \* for  $p < 0.05$ , \*\* for  $p < 0.01$ .

**Table S3.** Blue-collar workers. Exclusion of disability pension in Model 3 and 4. Outcome was retired (1) vs. still in work (0) two years later in relation to PDWT and PHWE in trichotomized variables.

|                                       | Blue-Collar Women   |                     | Blue-Collar Men     |                     |
|---------------------------------------|---------------------|---------------------|---------------------|---------------------|
|                                       | Manuscript          | Excl. Dis Pens      | Manuscript          | Excl. Dis Pens      |
| <b>Model 3:</b>                       |                     |                     |                     |                     |
| PDWT                                  |                     |                     |                     |                     |
| light (ref)                           | –                   | –                   | –                   | –                   |
| moderate                              | 1.24 (0.86; 1.78)   | 1.17 (0.81; 1.70)   | 1.04 (0.74; 1.47)   | 1.04 (0.73; 1.47)   |
| heavy                                 | 1.53 (1.07; 2.20) * | 1.49 (1.03; 2.16) * | 1.42 (1.02; 1.98) * | 1.48 (1.06; 2.08) * |
| PHWE                                  |                     |                     |                     |                     |
| low-level (ref)                       | –                   | –                   | –                   | –                   |
| moderate                              | 1.08 (0.78; 1.49)   | 1.09 (0.79; 1.52)   | 1.20 (0.82; 1.76)   | 1.30 (0.88; 1.92)   |
| high-level                            | 2.01 (1.19; 3.41) * | 1.79 (1.04; 3.09) * | 1.42 (0.98; 2.06) † | 1.55 (1.06; 2.27) * |
| <b>Model 4:</b>                       |                     |                     |                     |                     |
| Interaction term PDWT and linear age: |                     |                     |                     |                     |
| age#light (ref)                       | –                   | –                   | –                   | –                   |
| moderate                              | 0.97 (0.74; 1.28)   | 1.07 (0.80; 1.43)   | 1.06 (0.87; 1.30)   | 1.09 (0.88; 1.34)   |
| high-level                            | 0.77 (0.61; 0.99) * | 0.81 (0.63; 1.03) † | 1.10 (0.90; 1.36)   | 1.05 (0.85; 1.30)   |
| Interaction term PHWE and linear age: |                     |                     |                     |                     |
| low-level (ref)                       | –                   | –                   | –                   | –                   |
| moderate                              | 1.02 (0.81; 1.28)   | 1.01 (0.80; 1.28)   | 1.21 (0.98; 1.51) † | 1.17 (0.93; 1.48)   |
| high-level                            | 0.91 (0.66; 1.26)   | 0.98 (0.69; 1.39)   | 1.26 (1.02; 1.56) * | 1.21 (0.97; 1.50) † |

\* for  $p < 0.05$ ; † for  $0.05 \leq p < 0.10$ .**Table S4.** Blue-collar workers. Self-rated general health and physical & mental abilities added as covariates. Outcome was retired (1) vs. still in work (0) two years later in relation to PDWT and PHWE in trichotomized variables.

|                                       | Blue-Collar Women   |                     | Blue-Collar Men     |                     |
|---------------------------------------|---------------------|---------------------|---------------------|---------------------|
|                                       | Manuscript          | Modified            | Manuscript          | Modified            |
| <b>Model 3:</b>                       |                     |                     |                     |                     |
| PDWT                                  |                     |                     |                     |                     |
| light (ref)                           | –                   | –                   | –                   | –                   |
| moderate                              | 1.24 (0.86; 1.78)   | 1.23 (0.85; 1.79)   | 1.04 (0.74; 1.47)   | 1.06 (0.75; 1.51)   |
| heavy                                 | 1.53 (1.07; 2.20) * | 1.53 (1.05; 2.22) * | 1.42 (1.02; 1.98) * | 1.45 (1.03; 2.05) * |
| PHWE                                  |                     |                     |                     |                     |
| low-level (ref)                       | –                   | –                   | –                   | –                   |
| moderate                              | 1.08 (0.78; 1.49)   | 1.06 (0.76; 1.49)   | 1.20 (0.82; 1.76)   | 1.11 (0.75; 1.64)   |
| high-level                            | 2.01 (1.19; 3.41) * | 1.78 (1.04; 3.06) * | 1.42 (0.98; 2.06) † | 1.24 (0.85; 1.82)   |
| <b>Model 4:</b>                       |                     |                     |                     |                     |
| Interaction term PDWT and linear age: |                     |                     |                     |                     |
| age#light (ref)                       | –                   | –                   | –                   | –                   |
| moderate                              | 0.97 (0.74; 1.28)   | 0.97 (0.73; 1.28)   | 1.06 (0.87; 1.30)   | 1.04 (0.85; 1.28)   |
| high-level                            | 0.77 (0.61; 0.99) * | 0.79 (0.61; 1.01) † | 1.10 (0.90; 1.36)   | 1.06 (0.86; 1.31)   |
| Interaction term PHWE and linear age: |                     |                     |                     |                     |
| age#low-level (ref)                   | –                   | –                   | –                   | –                   |
| moderate                              | 1.02 (0.81; 1.28)   | 1.02 (0.81; 1.28)   | 1.21 (0.98; 1.51) † | 1.21 (0.97; 1.51) † |
| high-level                            | 0.91 (0.66; 1.26)   | 0.94 (0.67; 1.31)   | 1.26 (1.02; 1.56) * | 1.26 (1.02; 1.55) * |

\* for  $p < 0.05$ ; † for  $0.05 \leq p < 0.10$ .

**Table S5.** White-collar workers. Self-rated general health and physical and mental abilities added as covariates. Outcome was retired (1) vs. still in work (0) two years later in relation to PDWT and PHWE in dichotomised variables.

|                     | White-Collar Women    |                       | White-Collar Men    |                      |
|---------------------|-----------------------|-----------------------|---------------------|----------------------|
|                     | Manuscript            | Modified              | Manuscript          | Modified             |
| <b>Model 3:</b>     |                       |                       |                     |                      |
| PDWT                | 0.84 (0.70; 1.00) †   | 0.82 (0.69; 0.99) *   | 0.78 (0.63; 0.96) * | 0.74 (0.60; 0.92) ** |
| PHWE                | 1.10 (0.92; 1.31)     | 1.06 (0.89; 1.27)     | 1.04 (0.84; 1.30)   | 0.99 (0.79; 1.24)    |
| <b>Model 4:</b>     |                       |                       |                     |                      |
| Interaction term    |                       |                       |                     |                      |
| PDWT and linear age | 1.08 (0.97; 1.21)     | 1.08 (0.97; 1.21)     | 1.10 (0.98; 1.24)   | 1.10 (0.97; 1.24)    |
| Interaction term    |                       |                       |                     |                      |
| PHWE and linear age | 1.20 (1.08; 1.34) *** | 1.19 (1.07; 1.33) *** | 0.99 (0.87; 1.11)   | 0.98 (0.86; 1.10)    |

\*\*\* for  $p < 0.001$ ; \*\* for  $p < 0.01$ ; \* for  $p < 0.05$ ; † for  $0.05 \leq p < 0.10$ .
